# Supplementary material for: Improving the Substrate Affinity and Catalytic Efficiency of β-Glucosidase Bgl3A from Talaromyces leycettanus JCM12802 by Rational Design
Source: Biomolecules. 2021 Dec 15;11(12):1882. doi: 10.3390/biom11121882 (PMC8699594; doi:10.3390/biom11121882)
Supplement: Supplementary file 1 [file biomolecules-11-01882-s001.zip › biomolecules-1449461-supplementary.pdf]

---

## Supplementary Material

### Improving the substrate affinity and catalytic efficiency of $\beta$ -glucosidase Bgl3A from *Talaromyces leycettanus* JCM12802 by rational design

Wei Xia<sup>3</sup>, Yingguo Bai<sup>2</sup>, Pengjun Shi<sup>1\*</sup>

<sup>1</sup> Institute of Food Science and Technology, Chinese Academy of Agricultural Sciences, Beijing, China.

<sup>2</sup> Institute of Animal Science, Chinese Academy of Agricultural Sciences, Beijing 100193, PR China

<sup>3</sup> State Key Laboratory of Food Science and Technology, Jiangnan University, 1800 Lihu Avenue, Wuxi, 214122, China

\*Corresponding author

Pengjun Shi

Institute of Food Science and Technology, Chinese Academy of Agricultural Sciences, NO.2 Yuanmingyuan West Road, Haidian District, Beijing, 100081, People's Republic of China.

E-mail: shipengjun@caas.cn.

---

**Table S1. Primers used in this study.**

| Primer name       | Primer sequence (5'→3') <sup>a</sup>           |
|-------------------|------------------------------------------------|
| Bgl3A-PF          | GGG <u>GAATTC</u> TATGGCTTCGGCGGCTCTGGCTG      |
| Bgl3A-PR          | GGG <u>GCGCCGCT</u> CAAATACGGAAAGATTCCTGCT     |
| M36 Saturation -F | ACCGGTGTCAAGTGG <u>NNK</u> GGCGGCCCTTGTGTT     |
| M36 Saturation -R | AACACAAGGGCCGCC <u>MNN</u> CCACTTGACACCGGT     |
| E168Q-F           | AGCAAGAGCACAACCGT <u>CAG</u> ACCATCAGCTCCAACAT |
| E168Q-R           | ATGTTGGAGCTGATGGT <u>CTG</u> ACGGTTGTGCTCTTGCT |
| F66Y-F            | TCCTCTCGGGGTGCGT <u>ACT</u> GCCAACCTGTGACTGCC  |
| F66Y-R            | GGCAGTCACAGGGTTGGC <u>GTA</u> ACGCACCCCGAGAGGA |

<sup>a</sup> The restriction sites and mutation codons are shown underlined.

---

**Table S2. Specific activities and kinetic parameters of wild type Bgl3A and its mutants on cellobiose and gentiobiose.**

| Substrate   | Enzyme | Specific activity | $K_m$ | $k_{cat}$ | $k_{cat}/K_m$ | Fold   |
|-------------|--------|-------------------|-------|-----------|---------------|--------|
|             |        | (U/mg)            | (mM)  | (/s)      | (/s/mM)       | change |
| Gentiobiose | WT     | 393.2             | 5.4   | 877.6     | 164.1         | 1.00   |
|             | M36E   | 384.5             | 2.9   | 716.5     | 245.3         | 1.5    |
|             | M36N   | 328.4             | 3.1   | 611.7     | 194.7         | 1.2    |

---



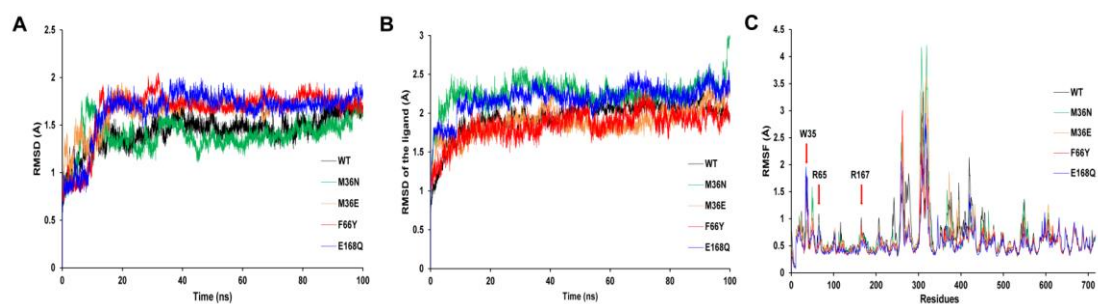

**Figure S2.** Root mean square deviation (RMSD) plots of the protein backbone (A) and the substrate (B) from the starting position, and root mean square fluctuations (RMSF) plots (C) of the five complexes during the MD simulation.
